# Supplementary material for: Are scientists biased against Christians? Exploring real and perceived bias against Christians in academic biology
Source: PubMed Central journal article supplement (PMC6988906; doi:10.1371/journal.pone.0226826), 2020-01-29
Supplement: pone.0226826.s005.pdf [file pone.0226826.s005.pdf]

**S5 File:** Surveys used to gauge student (a) hireability, (b) competence, and (c) likeability in Study 2 and Study 3, taken directly from Moss-Racusin, Dovidio, Brescoll, Graham, & Handelsman, 2012. (d) is the religious affiliation question used.

(a) Hireability

|                                                                                                                                | (Not at all) 1        | 2                     | 3                     | 4                     | 5                     | 6                     | (Very much) 7         |
|--------------------------------------------------------------------------------------------------------------------------------|-----------------------|-----------------------|-----------------------|-----------------------|-----------------------|-----------------------|-----------------------|
| How likely would you be to invite the applicant to interview to work in your lab as a Ph.D. student?                           | <input type="radio"/> | <input type="radio"/> | <input type="radio"/> | <input type="radio"/> | <input type="radio"/> | <input type="radio"/> | <input type="radio"/> |
| How likely would you be to accept this applicant to work in your lab as a Ph.D. student?                                       | <input type="radio"/> | <input type="radio"/> | <input type="radio"/> | <input type="radio"/> | <input type="radio"/> | <input type="radio"/> | <input type="radio"/> |
| How likely do you think it is that the applicant was actually accepted into the laboratory they applied to as a Ph.D. student? | <input type="radio"/> | <input type="radio"/> | <input type="radio"/> | <input type="radio"/> | <input type="radio"/> | <input type="radio"/> | <input type="radio"/> |

(b) Competence

|                                                                                   | (Not at all) 1        | 2                     | 3                     | 4                     | 5                     | 6                     | (Very much) 7         |
|-----------------------------------------------------------------------------------|-----------------------|-----------------------|-----------------------|-----------------------|-----------------------|-----------------------|-----------------------|
| Did the applicant strike you as competent?                                        | <input type="radio"/> | <input type="radio"/> | <input type="radio"/> | <input type="radio"/> | <input type="radio"/> | <input type="radio"/> | <input type="radio"/> |
| How likely is it that the applicant has the necessary skills to work in your lab? | <input type="radio"/> | <input type="radio"/> | <input type="radio"/> | <input type="radio"/> | <input type="radio"/> | <input type="radio"/> | <input type="radio"/> |
| How qualified do you think this applicant is to work in your lab?                 | <input type="radio"/> | <input type="radio"/> | <input type="radio"/> | <input type="radio"/> | <input type="radio"/> | <input type="radio"/> | <input type="radio"/> |

(c) Likeability

|                                                                                 | (Not at all) 1        | 2                     | 3                     | 4                     | 5                     | 6                     | (Very much) 7         |
|---------------------------------------------------------------------------------|-----------------------|-----------------------|-----------------------|-----------------------|-----------------------|-----------------------|-----------------------|
| How much did you like the applicant?                                            | <input type="radio"/> | <input type="radio"/> | <input type="radio"/> | <input type="radio"/> | <input type="radio"/> | <input type="radio"/> | <input type="radio"/> |
| Would you characterize the applicant as someone you want to get to know better? | <input type="radio"/> | <input type="radio"/> | <input type="radio"/> | <input type="radio"/> | <input type="radio"/> | <input type="radio"/> | <input type="radio"/> |
| Would the applicant fit in well with other members of your lab?                 | <input type="radio"/> | <input type="radio"/> | <input type="radio"/> | <input type="radio"/> | <input type="radio"/> | <input type="radio"/> | <input type="radio"/> |

(d)

Please indicate the religious affiliation you most closely identify with currently:

- Christian- Catholic
- Christian- Orthodox
- Christian- LDS (Latter Day Saints)
- Christian- Jehovah's Witness
- Christian- Other: please elaborate in the box provided
- Jewish
- Muslim
- Buddhist
- Hindu
- Other faith: please elaborate in the box provided
- Atheist (believes that God does not exist)
- Agnostic (does not have a definite belief about whether God exists or not)
- Nothing in particular- but my religion is important
- Nothing in particular- but my religion is not important
