# Supplementary material for: Are scientists biased against Christians? Exploring real and perceived bias against Christians in academic biology
Source: PubMed Central journal article supplement (PMC6988906; doi:10.1371/journal.pone.0226826), 2020-01-29
Supplement: pone.0226826.s008.pdf [file pone.0226826.s008.pdf]

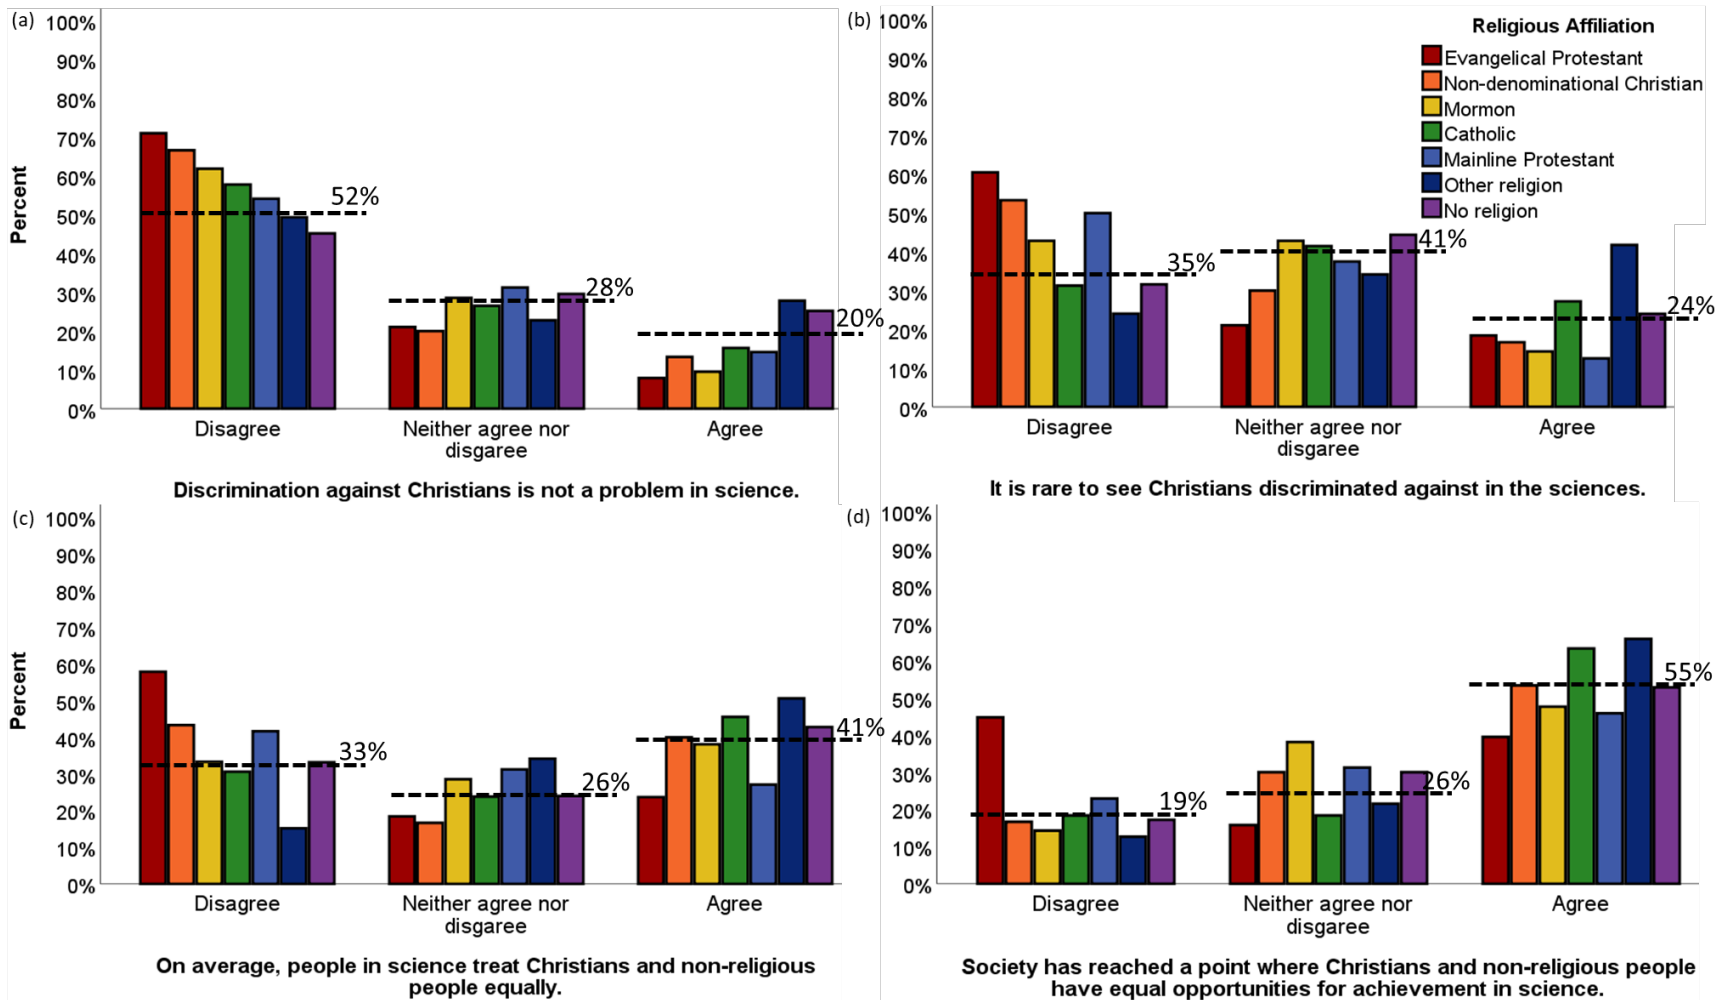

**S1 Figure:** Perceived bias against Christians in science broken down by religious denomination of upper level biology students (n = 664). The percentage indicated by the dashed black line is the percent of the whole sample.
