# Supplementary material for: Are scientists biased against Christians? Exploring real and perceived bias against Christians in academic biology
Source: PubMed Central journal article supplement (PMC6988906; doi:10.1371/journal.pone.0226826), 2020-01-29
Supplement: pone.0226826.s009.pdf [file pone.0226826.s009.pdf]

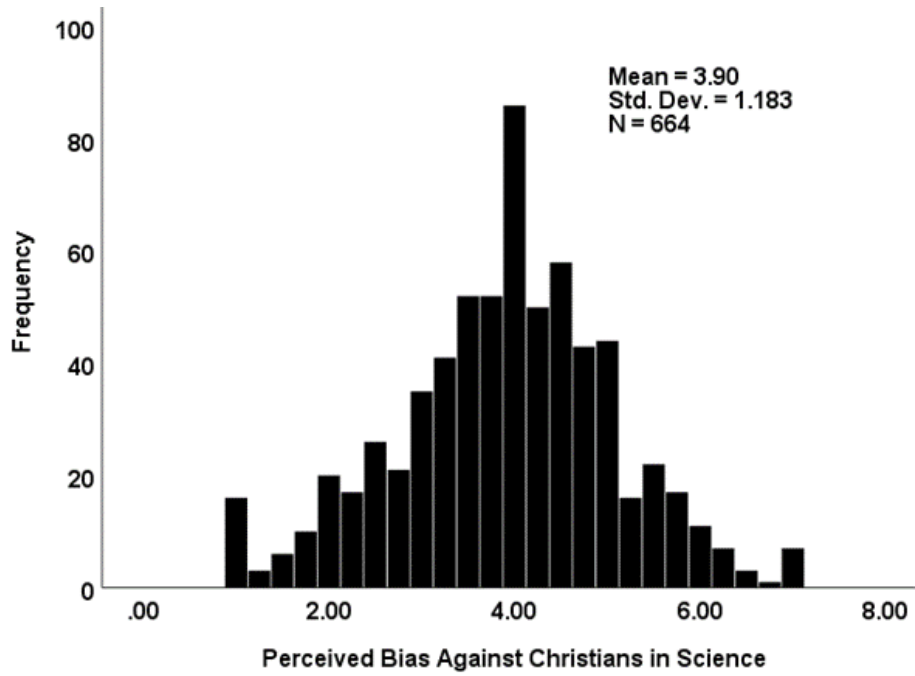

**S2 Figure:** Histogram of aggregate scores from all items on the Christian bias scale.
