# Supplementary material for: Are scientists biased against Christians? Exploring real and perceived bias against Christians in academic biology
Source: PubMed Central journal article supplement (PMC6988906; doi:10.1371/journal.pone.0226826), 2020-01-29
Supplement: pone.0226826.s011.pdf [file pone.0226826.s011.pdf]

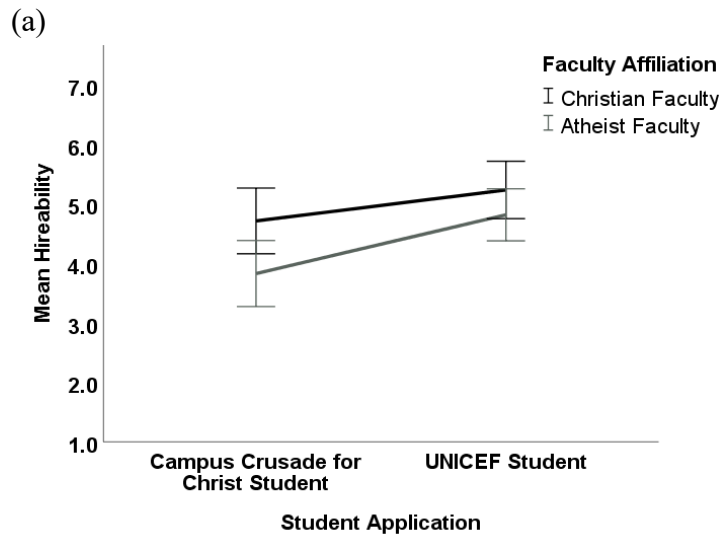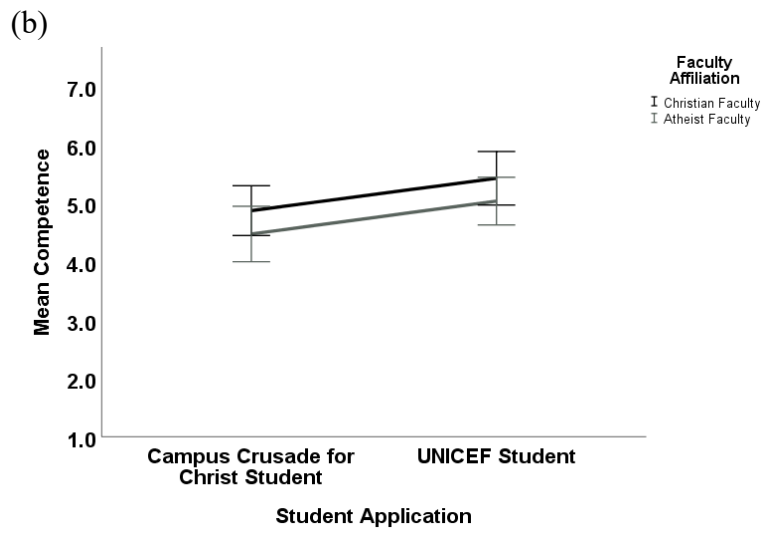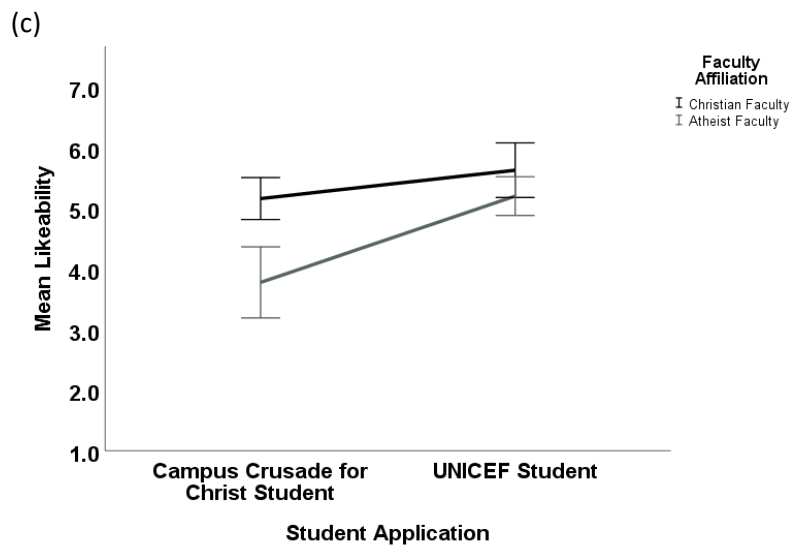

**S4 Figure:** Interaction between faculty religious affiliation and their ratings of student's by experimental condition for Study 3. (a) student hireability scores (b) student competence scores (c) student likeability scores. Error bars represent the 95% confidence intervals.
